# Supplementary material for: RAGE-TXNIP axis drives inflammation in Alzheimer’s by targeting Aβ to mitochondria in microglia
Source: PubMed Central journal article supplement (PMC8980056; doi:10.1038/s41419-022-04758-0), 2022-04-04
Supplement: 41419_2022_4758_MOESM2_ESM.pdf [file 41419_2022_4758_MOESM2_ESM.pdf]

## SUPPLEMENTARY FIGURE LEGENDS

**Supplementary Figure 1. Verapamil and siTXNIP lower Iba1 expression in the hippocampus of 5xFAD mice.** RT-qPCR of Iba1 hippocampal mRNA in wt and 5xFAD mice treated as indicated. One-way ANOVA followed by Tukey's multiple comparison test (n=5; \*\*\*\*p<0.0001 versus WT mice, #####p<0.0001 versus 5xFAD mice treated with scramble shRNA)

**Supplementary Figure 2. TXNIP silencing ameliorates A $\beta$ -induced mitochondria fractionation in primed primary microglia.** IHC of mitochondria using Mitotracker red. Nuclei are stained in blue with DAPI. Magnification of mitochondria are indicated with a square. Data are representative of 3 independent experiments.
