# Supplementary material for: RAGE-TXNIP axis drives inflammation in Alzheimer’s by targeting Aβ to mitochondria in microglia
Source: PubMed Central journal article supplement (PMC8980056; doi:10.1038/s41419-022-04758-0), 2022-04-04

Fig. 1E

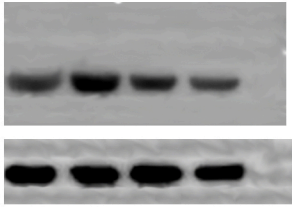

Fig. 2G

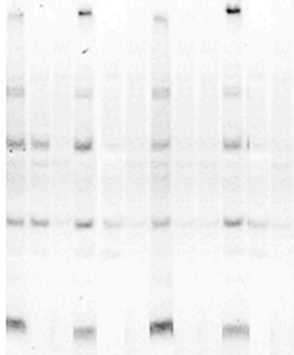

Fig. 3D

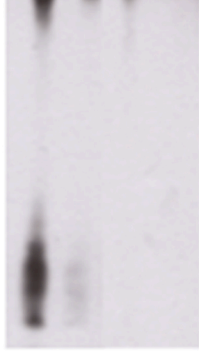

Fig. 3F

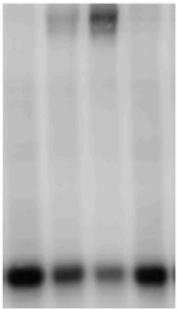

Fig. 2D

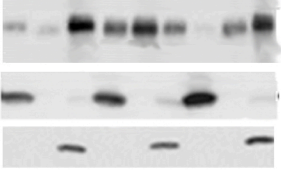

Fig. 3H

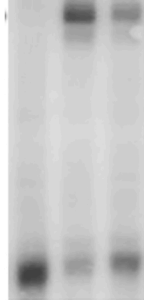

Fig. 6B

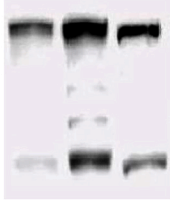

Fig. 6D

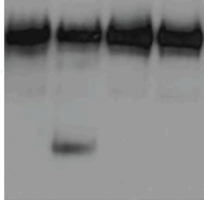

Supplement: 41419_2022_4758_MOESM5_ESM.pdf [file 41419_2022_4758_MOESM5_ESM.pdf]
